# Supplementary material for: Bioinformatic Indications That COPI- and Clathrin-Based Transport Systems Are Not Present in Chloroplasts: An Arabidopsis Model
Source: PubMed Central journal article supplement (PMC4138088; doi:10.1371/journal.pone.0104423), 2014-08-19
Supplement: pone.0104423.s002.pdf [file pone.0104423.s002.pdf]

**Table S2.** CCV API complex proteins from Arabidopsis (*A. thaliana*) cytosol (retrieved from Bassham et al, 2008), yeast (*S. cerevisiae*), mouse (*M. musculus*) and human (*H. sapiens*) cytosol (retrieved from Uniprot). Domains of these proteins were extracted using Prosite and Pfam, then run against the chloroplast protein dataset to identify proteins putatively involved in vesicle transport inside chloroplasts.

| Organism, Accession No., Uniprot ID         | Prosite profile/pattern, Entry No.                  | Chloroplast proteins, Prosite Entry No.                        | Pfam profile/pattern, Entry No.                                                                                                             | Chloroplast proteins, Pfam Entry No.                                    |
|---------------------------------------------|-----------------------------------------------------|----------------------------------------------------------------|---------------------------------------------------------------------------------------------------------------------------------------------|-------------------------------------------------------------------------|
| <b>γ subunit</b>                            |                                                     |                                                                |                                                                                                                                             |                                                                         |
| <i>A. thaliana</i> , At1g60070, Q9ZUI6      | Gamma-adaptin ear (GAE) domain profile: PS50180     | PS50180: n.d.                                                  | Adaptin N terminal region: PF01602<br><br>Adaptin C-terminal domain: PF02883                                                                | PF01602: At4g34450, At1g51350<br><br>PF02883: n.d.                      |
| <i>A. thaliana</i> , At1g23900, Q84K16      | Gamma-adaptin ear (GAE) domain profile: PS50180     | PS50180: n.d.                                                  | Adaptin N terminal region: PF01602<br><br>Adaptin C-terminal domain: PF02883                                                                | PF01602: At4g34450, At1g51350<br><br>PF02883: n.d.                      |
| <i>S. cerevisiae</i> , APL4 YPR029C, Q12028 | Peroxidases proximal heme-ligand signature: PS00435 | PS00435: At1g07890, At1g77490, At2g04270, At4g08390, At4g35000 | Adaptin N terminal region: PF01602<br><br>Adaptin C-terminal domain: PF02883                                                                | PF01602: At4g34450, At1g51350<br><br>PF02883: n.d.                      |
| <b>β1 subunit*</b>                          |                                                     |                                                                |                                                                                                                                             |                                                                         |
| <i>S. cerevisiae</i> , APL2 YKL135C, P36000 | n.d.                                                | -                                                              | Adaptin N terminal region: PF01602                                                                                                          | PF01602: At4g34450, At1g51350                                           |
| <b>β1/β2 subunit</b>                        |                                                     |                                                                |                                                                                                                                             |                                                                         |
| <i>A. thaliana</i> , At4g11380, Q9SUS3      | n.d.                                                | -                                                              | Adaptin N terminal region: PF01602<br><br>Adaptin C-terminal domain: PF02883<br><br>Beta2-adaptin appendage, C-terminal sub-domain: PF09066 | PF01602: At4g34450, At1g51350<br><br>PF02883: n.d.<br><br>PF09066: n.d. |
| <i>A. thaliana</i> , At4g23460, O81742      | n.d.                                                | -                                                              | Adaptin N terminal region: PF01602                                                                                                          | PF01602: At4g34450, At1g51350<br><br>PF02883: n.d.                      |

|                                                      |                                                                                                                                                                                   |                                                                 |                                                                                                       |                                    |
|------------------------------------------------------|-----------------------------------------------------------------------------------------------------------------------------------------------------------------------------------|-----------------------------------------------------------------|-------------------------------------------------------------------------------------------------------|------------------------------------|
|                                                      |                                                                                                                                                                                   |                                                                 | Adaptin C-terminal domain: PF02883<br><br>Beta2-adaptin appendage, C-terminal sub-domain: PF09066     | PF09066: n.d.                      |
| <b>μ1 subunit</b>                                    |                                                                                                                                                                                   |                                                                 |                                                                                                       |                                    |
| <i>A. thaliana</i> ,<br>At1g60780,<br>O22715         | Mu homology domain (MHD) profile: PS51072<br><br>Clathrin adaptor complexes medium chain signature 1: PS00990<br><br>Clathrin adaptor complexes medium chain signature 2: PS00991 | PS51072:<br>At5g57460<br><br>PS00990: n.d.<br><br>PS00991: n.d. | Clathrin adaptor complex small chain: PF01217<br><br>Adaptor complexes medium subunit family: PF00928 | PF01217: n.d.<br><br>PF00928: n.d. |
| <i>A. thaliana</i> ,<br>At1g10730,<br>Q9SAC9         | Mu homology domain (MHD) profile: PS51072<br><br>Clathrin adaptor complexes medium chain signature 2: PS00991                                                                     | PS51072:<br>At5g57460<br><br>PS00991: n.d.                      | Clathrin adaptor complex small chain: PF01217<br><br>Adaptor complexes medium subunit family: PF00928 | PF01217: n.d.<br><br>PF00928: n.d. |
| <i>S. cerevisiae</i> ,<br>APM1<br>YPL259C,<br>Q00776 | Mu homology domain (MHD) profile: PS51072<br><br>Clathrin adaptor complexes medium chain signature 1: PS00990<br><br>Clathrin adaptor complexes medium chain signature 2: PS00991 | PS51072:<br>At5g57460<br><br>PS00990: n.d.<br><br>PS00991: n.d. | Clathrin adaptor complex small chain: PF01217<br><br>Adaptor complexes medium subunit family: PF00928 | PF01217: n.d.<br><br>PF00928: n.d. |
| <b>σ1 subunit</b>                                    |                                                                                                                                                                                   |                                                                 |                                                                                                       |                                    |
| <i>A. thaliana</i> ,<br>At2g17380,<br>Q8LEZ8         | Clathrin adaptor complexes small chain signature: PS00989                                                                                                                         | PS00989: n.d.                                                   | Clathrin adaptor complex small chain: PF01217                                                         | PF01217: n.d.                      |
| <i>A. thaliana</i> ,<br>At4g35410,                   | Clathrin adaptor complexes small                                                                                                                                                  | PS00989: n.d.                                                   | Clathrin adaptor complex small                                                                        | PF01217: n.d.                      |

|                                        |                                                                    |               |                                                     |               |
|----------------------------------------|--------------------------------------------------------------------|---------------|-----------------------------------------------------|---------------|
| O23685                                 | chain signature:<br>PS00989                                        |               | chain: PF01217                                      |               |
| <i>M. musculus</i> ,<br>Aps1s1, P61967 | Clathrin adaptor<br>complexes small<br>chain signature:<br>PS00989 | PS00989: n.d. | Clathrin adaptor<br>complex small<br>chain: PF01217 | PF01217: n.d. |

n.d., not detected
