# Supplementary material for: Bioinformatic Indications That COPI- and Clathrin-Based Transport Systems Are Not Present in Chloroplasts: An Arabidopsis Model
Source: PubMed Central journal article supplement (PMC4138088; doi:10.1371/journal.pone.0104423), 2014-08-19
Supplement: pone.0104423.s003.pdf [file pone.0104423.s003.pdf]

**Table S3.** CCV AP2 complex proteins from Arabidopsis (*A. thaliana*) cytosol (retrieved from Bassham et al, 2008) and yeast (*S. cerevisiae*), mouse (*M. musculus*) and human (*H. sapiens*) cytosol (retrieved from Uniprot). Domains of these proteins were extracted using Prosite and Pfam, then run against the chloroplast protein dataset to identify proteins putatively involved in vesicle transport inside chloroplasts.

| Organism, Accession No., Uniprot ID                    | Prosite profile/pattern, Entry No.                          | Chloroplast proteins, Prosite Entry No.                        | Pfam profile/pattern, Entry No.                                                                                                   | Chloroplast proteins, Pfam Entry No.                                    |
|--------------------------------------------------------|-------------------------------------------------------------|----------------------------------------------------------------|-----------------------------------------------------------------------------------------------------------------------------------|-------------------------------------------------------------------------|
| <b><math>\alpha</math> subunit</b>                     |                                                             |                                                                |                                                                                                                                   |                                                                         |
| <i>A. thaliana</i> , At5g22770, Q8LPL6                 | n.d.                                                        | -                                                              | Adaptin N terminal region: PF01602<br><br>Adaptin C-terminal domain: PF02883<br><br>Alpha adaptin AP2, C-terminal domain: PF02296 | PF01602: At4g34450, At1g51350<br><br>PF02883: n.d.<br><br>PF02296: n.d. |
| <i>A. thaliana</i> , At5g22780, Q8LPK4                 | n.d.                                                        | -                                                              | Adaptin N terminal region: PF01602<br><br>Adaptin C-terminal domain: PF02883<br><br>Alpha adaptin AP2, C-terminal domain: PF02296 | PF01602: At4g34450, At1g51350<br><br>PF02883: n.d.<br><br>PF02296: n.d. |
| <i>S. cerevisiae</i> , APL3 YBL037W, P38065            | n.d.                                                        | -                                                              | Adaptin N terminal region: PF01602<br><br>Adaptin C-terminal domain: PF02883                                                      | PF01602: At4g34450, At1g51350<br><br>PF02883: n.d.                      |
| <b><math>\beta</math>2 subunit*</b>                    |                                                             |                                                                |                                                                                                                                   |                                                                         |
| <i>S. cerevisiae</i> , APL1 YJR005W, P27351            | Carbamoyl-phosphate synthase subdomain signature 2: PS00867 | PS00867: At1g29900, At1g32470, At1g36180, At5g35360, At5g46420 | Adaptin N terminal region: PF01602                                                                                                | PF01602: At4g34450, At1g51350                                           |
| <b><math>\beta</math>1/<math>\beta</math>2 subunit</b> | See above                                                   | See above                                                      | See above                                                                                                                         | See above                                                               |
| <b><math>\mu</math>2 subunit</b>                       |                                                             |                                                                |                                                                                                                                   |                                                                         |
| <i>A. thaliana</i> , At5g46630, B9DI54                 | Mu homology domain (MHD) profile: PS51072                   | PS51072: At5g57460                                             | Adaptor complexes medium subunit                                                                                                  | PF00928: n.d.                                                           |

|                                                      |                                                                    |                       |                                                              |               |
|------------------------------------------------------|--------------------------------------------------------------------|-----------------------|--------------------------------------------------------------|---------------|
|                                                      |                                                                    |                       | family:<br>PF00928                                           |               |
| <i>S. cerevisiae</i> ,<br>APM4<br>YOL062C,<br>Q99186 | Mu homology<br>domain (MHD)<br>profile: PS51072                    | PS51072:<br>At5g57460 | Adaptor<br>complexes<br>medium subunit<br>family:<br>PF00928 | PF00928: n.d. |
| <b>σ2 subunit</b>                                    |                                                                    |                       |                                                              |               |
| <i>A. thaliana</i> ,<br>At1g47830,<br>Q84WL9         | n.d.                                                               | -                     | Clathrin adaptor<br>complex small<br>chain: PF01217          | PF01217: n.d. |
| <i>S. cerevisiae</i> ,<br>APS2 YJR058C,<br>Q00381    | Clathrin adaptor<br>complexes small<br>chain signature:<br>PS00989 | n.d.                  | Clathrin adaptor<br>complex small<br>chain: PF01217          | PF01217: n.d. |

n.d., not detected
