# Supplementary material for: Bioinformatic Indications That COPI- and Clathrin-Based Transport Systems Are Not Present in Chloroplasts: An Arabidopsis Model
Source: PubMed Central journal article supplement (PMC4138088; doi:10.1371/journal.pone.0104423), 2014-08-19
Supplement: pone.0104423.s005.pdf [file pone.0104423.s005.pdf]

**Table S5.** CCV AP4 complex proteins from Arabidopsis (*A. thaliana*) cytosol (retrieved from Bassham et al, 2008) and yeast (*S. cerevisiae*), mouse (*M. musculus*) and human (*H. sapiens*) cytosol (retrieved from Uniprot). Domains of these proteins were extracted using Prosite and Pfam, then run against the chloroplast protein dataset to identify proteins putatively involved in vesicle transport in chloroplasts.

| Organism, Accession No., Uniprot ID    | Prosite profile/pattern, Entry No.        | Chloroplast proteins, Prosite Entry No. | Pfam profile/pattern, Entry No.                                                                       | Chloroplast proteins, Pfam Entry No.               |
|----------------------------------------|-------------------------------------------|-----------------------------------------|-------------------------------------------------------------------------------------------------------|----------------------------------------------------|
| <b>ε subunit</b>                       |                                           |                                         |                                                                                                       |                                                    |
| <i>A. thaliana</i> , At1g31730, Q8L7A9 | n.d.                                      | -                                       | Adaptin N terminal region: PF01602                                                                    | PF01602: At4g34450, At1g51350                      |
| <i>H. sapiens</i> , AP4E1, Q9UPM8      | n.d.                                      | -                                       | Adaptin N terminal region: PF01602<br><br>Adaptin AP4 complex epsilon appendage platform: PF14807     | PF01602: At4g34450, At1g51350<br><br>PF14807: n.d. |
| <b>β4 subunit</b>                      |                                           |                                         |                                                                                                       |                                                    |
| <i>A. thaliana</i> , At5g11490, Q9LDK9 | n.d.                                      | -                                       | Adaptin N terminal region: PF01602<br><br>Beta2-adaptin appendage, C-terminal sub-domain: PF09066     | PF01602: At4g34450, At1g51350<br><br>PF09066: n.d. |
| <i>M. musculus</i> , Ap4b1, Q9WV76     | n.d.                                      | -                                       | Adaptin N terminal region: PF01602<br><br>Beta2-adaptin appendage, C-terminal sub-domain: PF09066     | PF01602: At4g34450, At1g51350<br><br>PF09066: n.d. |
| <b>μ4 subunit</b>                      |                                           |                                         |                                                                                                       |                                                    |
| <i>A. thaliana</i> , At4g24550, Q9SB50 | Mu homology domain (MHD) profile: PS51072 | PS51072: At5g57460                      | Clathrin adaptor complex small chain: PF01217<br><br>Adaptor complexes medium subunit family: PF00928 | PF01217: n.d.<br><br>PF00928: n.d.                 |
| <i>H. sapiens</i> , AP4M1, O00189      | Mu homology domain (MHD) profile: PS51072 | PS51072: At5g57460<br><br>PS00991: n.d. | Clathrin adaptor complex small chain: PF01217                                                         | PF01217: n.d.<br><br>PF00928: n.d.                 |

|                                        |                                                              |                    |                                                                                                       |                                |
|----------------------------------------|--------------------------------------------------------------|--------------------|-------------------------------------------------------------------------------------------------------|--------------------------------|
|                                        | Clathrin adaptor complexes medium chain signature 2: PS00991 |                    | Adaptor complexes medium subunit family: PF00928                                                      |                                |
| <b>σ4 subunit</b>                      |                                                              |                    |                                                                                                       |                                |
| <i>A. thaliana</i> , At4g24550, Q9SB50 | Mu homology domain (MHD) profile: PS51072                    | PS51072: At5g57460 | Clathrin adaptor complex small chain: PF01217<br><br>Adaptor complexes medium subunit family: PF00928 | PF01217: n.d.<br>PF00928: n.d. |
| <i>H. sapiens</i> , AP4S1, Q9Y587      | n.d.                                                         | -                  | Clathrin adaptor complex small chain: PF01217                                                         | PF01217: n.d.                  |
| n.d., not detected                     |                                                              |                    |                                                                                                       |                                |
