# Supplementary material for: Bioinformatic Indications That COPI- and Clathrin-Based Transport Systems Are Not Present in Chloroplasts: An Arabidopsis Model
Source: PubMed Central journal article supplement (PMC4138088; doi:10.1371/journal.pone.0104423), 2014-08-19
Supplement: pone.0104423.s007.pdf [file pone.0104423.s007.pdf]

**Table S7.** B-COPI subcomplex proteins from Arabidopsis (*A. thaliana*) cytosol (retrieved from Bassham et al, 2008) and yeast (*S. cerevisiae*), mouse (*M. musculus*) and human (*H. sapiens*) cytosol (retrieved from Uniprot). Domains of these proteins were extracted using Prosite and Pfam, then run against the chloroplast protein dataset to identify proteins putatively involved in vesicle transport inside chloroplasts.

| Organism, Accession No., Uniprot ID         | Prosite profile/pattern, Entry No.                                                                                                         | Chloroplast proteins, Prosite Entry No.                                                                                                                                                                                     | Pfam profile/pattern, Entry No.                                                                                                          | Chloroplast proteins, Pfam Entry No.                                                                                                                 |
|---------------------------------------------|--------------------------------------------------------------------------------------------------------------------------------------------|-----------------------------------------------------------------------------------------------------------------------------------------------------------------------------------------------------------------------------|------------------------------------------------------------------------------------------------------------------------------------------|------------------------------------------------------------------------------------------------------------------------------------------------------|
| <b><math>\alpha</math> subunit</b>          |                                                                                                                                            |                                                                                                                                                                                                                             |                                                                                                                                          |                                                                                                                                                      |
| <i>A. thaliana</i> , At1g62020, Q94A40      | Trp-Asp (WD) repeats profile: PS50082<br><br>Trp-Asp (WD) repeats circular profile: PS50294<br><br>Trp-Asp (WD) repeats signature: PS00678 | PS50082: At1g18080, At2g33340, At4g22910, At5g13840, At1g24130, At4g02660, At5g58230, At1g15850<br><br>PS50294: At1g18080, At2g33340, At5g13840, At1g24130, At4g22910, At5g58230, At1g15850, At4g02660<br><br>PS00678: n.d. | WD domain, G-beta repeat: PF00400<br><br>Coatomer WD associated region: PF04053<br><br>Coatomer (COPI) alpha subunit C-terminus: PF06957 | PF00400: At1g18080, At1g24130, At2g33340, At5g58230, At4g22910, At5g13840, At1g15850, At4g02660, At4g30840<br><br>PF04053: n.d.<br><br>PF06957: n.d. |
| <i>A. thaliana</i> , At2g21390, Q9SJT9      | Trp-Asp (WD) repeats profile: PS50082<br><br>Trp-Asp (WD) repeats circular profile: PS50294<br><br>Trp-Asp (WD) repeats signature: PS00678 | PS50082: At1g18080, At2g33340, At4g22910, At5g13840, At1g24130, At4g02660, At5g58230, At1g15850<br><br>PS50294: At1g18080, At2g33340, At5g13840, At1g24130, At4g22910, At5g58230, At1g15850, At4g02660<br><br>PS00678: n.d. | WD domain, G-beta repeat: PF00400<br><br>Coatomer WD associated region: PF04053<br><br>Coatomer (COPI) alpha subunit C-terminus: PF06957 | PF00400: At1g18080, At1g24130, At2g33340, At5g58230, At4g22910, At5g13840, At1g15850, At4g02660, At4g30840<br><br>PF04053: n.d.<br><br>PF06957: n.d. |
| <i>S. cerevisiae</i> , COP1 YDL145C, P53622 | Trp-Asp (WD) repeats profile: PS50082<br><br>Trp-Asp (WD) repeats circular profile: PS50294                                                | PS50082: At1g18080, At2g33340, At4g22910, At5g13840, At1g24130, At4g02660,                                                                                                                                                  | WD domain, G-beta repeat: PF00400<br><br>Coatomer WD associated region: PF04053                                                          | PF00400: At1g18080, At1g24130, At2g33340, At5g58230, At4g22910, At5g13840, At1g15850, At4g02660, At4g30840<br><br>PF04053: n.d.                      |

|                                              |                                                                                                         |                                                                                                                                                                                                                                                        |                                                                                              |                                                                                                                                             |
|----------------------------------------------|---------------------------------------------------------------------------------------------------------|--------------------------------------------------------------------------------------------------------------------------------------------------------------------------------------------------------------------------------------------------------|----------------------------------------------------------------------------------------------|---------------------------------------------------------------------------------------------------------------------------------------------|
|                                              | Trp-Asp (WD)<br>repeats signature:<br>PS00678                                                           | At5g58230,<br>At1g15850<br><br>PS50294:<br>At1g18080,<br>At2g33340<br>At5g13840,<br>At1g24130,<br>At4g22910,<br>At5g58230,<br>At1g15850,<br>At4g02660<br><br>PS00678: n.d.                                                                             | Coatomer (COPI)<br>alpha subunit C-<br>terminus: PF06957                                     | PF06957: n.d.                                                                                                                               |
| <b>β' subunit</b>                            |                                                                                                         |                                                                                                                                                                                                                                                        |                                                                                              |                                                                                                                                             |
| <i>A. thaliana</i> ,<br>At1g52360,<br>Q9C827 | Trp-Asp (WD)<br>repeats profile:<br>PS50082<br><br>Trp-Asp (WD)<br>repeats circular<br>profile: PS50294 | PS50082:<br>At1g18080,<br>At2g33340,<br>At5g13840,<br>At1g24130,<br>At4g22910,<br>At5g58230,<br>At1g15850,<br>At4g02660<br><br>PS50294:<br>At1g18080,<br>At2g33340,<br>At5g13840,<br>At1g24130,<br>At4g22910,<br>At5g58230,<br>At1g15850,<br>At4g02660 | WD domain, G-<br>beta repeat:<br>PF00400<br><br>Coatomer WD<br>associated region:<br>PF04053 | PF00400: At1g18080,<br>At1g24130, At2g33340,<br>At5g58230, At4g22910,<br>At5g13840, At1g15850,<br>At4g02660, At4g30840<br><br>PF04053: n.d. |
| <i>A. thaliana</i> ,<br>At3g15980,<br>Q8L828 | Trp-Asp (WD)<br>repeats profile:<br>PS50082<br><br>Trp-Asp (WD)<br>repeats circular<br>profile: PS50294 | PS50082:<br>At1g18080,<br>At2g33340,<br>At5g13840,<br>At1g24130,<br>At4g22910,<br>At5g58230,<br>At1g15850,<br>At4g02660<br><br>PS50294:<br>At1g18080,<br>At2g33340,<br>At5g13840,<br>At1g24130,<br>At4g22910,<br>At5g58230,<br>At1g15850,<br>At4g02660 | WD domain, G-<br>beta repeat: F00400<br><br>Coatomer WD<br>associated region:<br>PF04053     | PF00400: At1g18080,<br>At1g24130, At2g33340,<br>At5g58230, At4g22910,<br>At5g13840, At1g15850,<br>At4g02660, At4g30840<br><br>PF04053: n.d. |
| <i>A. thaliana</i> ,<br>At1g79990,<br>Q9CAA0 | Trp-Asp (WD)<br>repeats profile:<br>PS50082                                                             | PS50082:<br>At1g18080,<br>At2g33340,                                                                                                                                                                                                                   | WD domain, G-<br>beta repeat: F00400                                                         | PF00400: At1g18080,<br>At1g24130, At2g33340,<br>At5g58230, At4g22910,                                                                       |

|                                              |                                                                                                                                     |                                                                                                                                                                                                                                                        |                                                                                          |                                                                                                                                             |
|----------------------------------------------|-------------------------------------------------------------------------------------------------------------------------------------|--------------------------------------------------------------------------------------------------------------------------------------------------------------------------------------------------------------------------------------------------------|------------------------------------------------------------------------------------------|---------------------------------------------------------------------------------------------------------------------------------------------|
|                                              | Trp-Asp (WD)<br>repeats circular<br>profile: PS50294                                                                                | At5g13840,<br>At1g24130,<br>At4g22910,<br>At5g58230,<br>At1g15850<br>At4g02660<br><br>PS50294:<br>At1g18080,<br>At2g33340,<br>At5g13840,<br>At1g24130,<br>At4g22910,<br>At5g58230,<br>At1g15850,<br>At4g02660                                          | Coatomer WD<br>associated region:<br>PF04053                                             | At5g13840, At1g15850,<br>At4g02660, At4g30840<br><br>PF04053: n.d.                                                                          |
| <i>H. sapiens</i> ,<br>COPB2, P35606         | Trp-Asp (WD)<br>repeats profile:<br>PS50082<br><br>Trp-Asp (WD)<br>repeats circular<br>profile: PS50294                             | PS50082:<br>At1g18080,<br>At2g33340,<br>At5g13840,<br>At1g24130,<br>At4g22910,<br>At5g58230,<br>At1g15850,<br>At4g02660<br><br>PS50294:<br>At1g18080,<br>At2g33340,<br>At5g13840,<br>At1g24130,<br>At4g22910,<br>At5g58230,<br>At1g15850,<br>At4g02660 | WD domain, G-<br>beta repeat: F00400<br><br>Coatomer WD<br>associated region:<br>PF04053 | PF00400: At1g18080,<br>At1g24130, At2g33340,<br>At5g58230, At4g22910,<br>At5g13840, At1g15850,<br>At4g02660, At4g30840<br><br>PF04053: n.d. |
| <b>ε subunit</b>                             |                                                                                                                                     |                                                                                                                                                                                                                                                        |                                                                                          |                                                                                                                                             |
| <i>A. thaliana</i> ,<br>At2g34840,<br>O64748 | Regulator of<br>chromosome<br>condensation<br>(RCC1) signature<br>2: PS00626<br><br>Ribosomal protein<br>S2 signature 1:<br>PS00962 | PS00626: n.d.<br><br>PS00962: n.d.                                                                                                                                                                                                                     | Coatomer epsilon<br>subunit: PF04733                                                     | PF04733: n.d.                                                                                                                               |
| <i>A. thaliana</i> ,<br>At1g30630,<br>Q9SA78 | Ribosomal protein<br>S2 signature 1:<br>PS00962                                                                                     | PS00962: n.d.                                                                                                                                                                                                                                          | Coatomer epsilon<br>subunit: PF04733                                                     | PF04733: n.d.                                                                                                                               |
| <i>H. sapiens</i> ,<br>COPE, O14579          | n.d.                                                                                                                                | -                                                                                                                                                                                                                                                      | Coatomer epsilon<br>subunit: PF04733                                                     | PF04733: n.d.                                                                                                                               |

n.d., not detected
